# Supplementary material
Source: MDPI journal article supplement (https://www.mdpi.com/2075-163X/11/6/573)
Supplement: s1 [file s1]

| Sample | Q <sub>mue</sub> | Q <sub>muu</sub> | Q <sub>pq (2-3)</sub> | Q <sub>pq&gt; 3</sub> | Q <sub>total</sub> | A  | P | F <sub>total</sub> | L <sub>v</sub> | L <sub>m</sub> | L <sub>s</sub> | L <sub>total</sub> | M | D  | O | Total |
|--------|------------------|------------------|-----------------------|-----------------------|--------------------|----|---|--------------------|----------------|----------------|----------------|--------------------|---|----|---|-------|
| DU1    | 378              | 42               | 23                    | 7                     | 450                | 0  | 0 | 0                  | 0              | 0              | 0              | 0                  | 8 | 42 | 0 | 500   |
| DU2    | 327              | 58               | 67                    | 25                    | 477                | 0  | 0 | 0                  | 0              | 0              | 0              | 0                  | 2 | 21 | 0 | 500   |
| DU3    | 332              | 113              | 31                    | 17                    | 493                | 0  | 0 | 0                  | 5              | 0              | 0              | 5                  | 0 | 2  | 0 | 500   |
| DU4    | 407              | 75               | 13                    | 2                     | 497                | 0  | 0 | 0                  | 0              | 0              | 0              | 0                  | 0 | 3  | 0 | 500   |
| DU5    | 347              | 96               | 26                    | 17                    | 486                | 0  | 2 | 2                  | 2              | 3              | 5              | 10                 | 0 | 2  | 0 | 500   |
| DU6    | 310              | 78               | 60                    | 38                    | 486                | 0  | 2 | 2                  | 0              | 4              | 0              | 4                  | 2 | 6  | 0 | 500   |
| DU7    | 310              | 74               | 74                    | 36                    | 494                | 0  | 0 | 0                  | 0              | 0              | 0              | 0                  | 0 | 2  | 4 | 500   |
| DU8    | 324              | 74               | 52                    | 40                    | 490                | 0  | 0 | 0                  | 0              | 2              | 4              | 6                  | 0 | 0  | 4 | 500   |
| KF 1   | 444              | 32               | 16                    | 4                     | 496                | 0  | 0 | 0                  | 0              | 0              | 0              | 0                  | 0 | 0  | 4 | 500   |
| KF 2   | 416              | 52               | 22                    | 6                     | 496                | 0  | 0 | 0                  | 0              | 0              | 0              | 0                  | 0 | 2  | 2 | 500   |
| KF 3   | 424              | 64               | 8                     | 2                     | 498                | 0  | 0 | 0                  | 0              | 0              | 0              | 0                  | 0 | 2  | 0 | 500   |
| KF 4   | 428              | 28               | 24                    | 14                    | 494                | 0  | 0 | 0                  | 0              | 0              | 0              | 0                  | 0 | 6  | 0 | 500   |
| KF 5   | 386              | 46               | 52                    | 12                    | 496                | 0  | 0 | 0                  | 0              | 0              | 0              | 0                  | 2 | 2  | 0 | 500   |
| KF 7   | 388              | 82               | 20                    | 8                     | 498                | 0  | 0 | 0                  | 0              | 0              | 2              | 2                  | 0 | 0  | 0 | 500   |
| KF 10  | 444              | 34               | 14                    | 6                     | 498                | 0  | 0 | 0                  | 0              | 0              | 0              | 0                  | 0 | 0  | 2 | 500   |
| KF 12  | 452              | 30               | 10                    | 4                     | 496                | 0  | 0 | 0                  | 0              | 0              | 0              | 0                  | 0 | 4  | 0 | 500   |
| KF 13  | 446              | 28               | 18                    | 0                     | 492                | 0  | 0 | 0                  | 0              | 0              | 0              | 0                  | 2 | 6  | 0 | 500   |
| DK-a   | 196              | 86               | 36                    | 110                   | 428                | 4  | 0 | 4                  | 10             | 36             | 18             | 64                 | 0 | 4  | 0 | 500   |
| DK-b   | 394              | 72               | 28                    | 4                     | 498                | 0  | 0 | 0                  | 0              | 0              | 2              | 2                  | 0 | 0  | 0 | 500   |
| DK-c   | 394              | 68               | 20                    | 6                     | 488                | 2  | 0 | 2                  | 2              | 0              | 2              | 4                  | 0 | 4  | 2 | 500   |
| DK-d   | 430              | 36               | 12                    | 2                     | 480                | 0  | 0 | 0                  | 0              | 0              | 0              | 0                  | 4 | 10 | 6 | 500   |
| DK-17  | 238              | 90               | 74                    | 70                    | 472                | 0  | 0 | 0                  | 4              | 14             | 4              | 22                 | 0 | 0  | 6 | 500   |
| DK-19  | 378              | 90               | 18                    | 6                     | 492                | 0  | 0 | 0                  | 2              | 2              | 2              | 6                  | 0 | 0  | 2 | 500   |
| DK-21  | 402              | 70               | 8                     | 14                    | 494                | 2  | 0 | 2                  | 0              | 4              | 0              | 4                  | 0 | 0  | 0 | 500   |
| DK-22  | 450              | 30               | 12                    | 4                     | 496                | 0  | 0 | 0                  | 0              | 0              | 0              | 0                  | 0 | 4  | 0 | 500   |
| DK-24  | 452              | 20               | 4                     | 0                     | 476                | 0  | 0 | 0                  | 0              | 0              | 0              | 0                  | 2 | 18 | 4 | 500   |
| DK-25  | 460              | 18               | 8                     | 0                     | 486                | 0  | 0 | 0                  | 0              | 0              | 0              | 0                  | 0 | 14 | 0 | 500   |
| DK-27  | 430              | 48               | 8                     | 6                     | 492                | 4  | 0 | 4                  | 0              | 2              | 0              | 2                  | 0 | 2  | 0 | 500   |
| DK-28  | 438              | 44               | 12                    | 2                     | 496                | 0  | 0 | 0                  | 0              | 0              | 0              | 0                  | 0 | 4  | 0 | 500   |
| DK-37  | 434              | 30               | 10                    | 4                     | 478                | 0  | 0 | 0                  | 0              | 0              | 0              | 0                  | 4 | 16 | 2 | 500   |
| DK-42  | 384              | 100              | 6                     | 4                     | 494                | 2  | 0 | 2                  | 0              | 0              | 0              | 0                  | 0 | 4  | 0 | 500   |
| DK-54  | 458              | 18               | 8                     | 6                     | 490                | 0  | 0 | 0                  | 0              | 0              | 0              | 0                  | 2 | 8  | 0 | 500   |
| DK-55  | 428              | 66               | 4                     | 0                     | 498                | 0  | 0 | 0                  | 0              | 0              | 0              | 0                  | 0 | 2  | 0 | 500   |
| DK-56  | 438              | 42               | 14                    | 0                     | 494                | 2  | 0 | 2                  | 0              | 2              | 0              | 2                  | 0 | 2  | 0 | 500   |
| DK-57  | 422              | 62               | 12                    | 0                     | 496                | 2  | 0 | 2                  | 0              | 0              | 0              | 0                  | 0 | 2  | 0 | 500   |
| DK-58  | 458              | 32               | 8                     | 2                     | 500                | 0  | 0 | 0                  | 0              | 0              | 0              | 0                  | 0 | 0  | 0 | 500   |
| DK-62  | 478              | 2                | 0                     | 0                     | 480                | 0  | 0 | 0                  | 0              | 0              | 0              | 0                  | 0 | 16 | 4 | 500   |
| DN-1   | 153              | 165              | 52                    | 90                    | 460                | 3  | 0 | 3                  | 3              | 20             | 12             | 35                 | 0 | 2  | 0 | 500   |
| DN-2   | 400              | 74               | 22                    | 2                     | 498                | 0  | 0 | 0                  | 0              | 0              | 0              | 0                  | 0 | 2  | 0 | 500   |
| DN-3   | 330              | 92               | 42                    | 8                     | 472                | 2  | 0 | 2                  | 0              | 0              | 0              | 0                  | 0 | 24 | 2 | 500   |
| DN-5   | 225              | 153              | 42                    | 35                    | 455                | 10 | 0 | 10                 | 5              | 10             | 15             | 30                 | 0 | 3  | 2 | 500   |
| DN-6   | 303              | 117              | 22                    | 43                    | 485                | 3  | 0 | 3                  | 0              | 3              | 7              | 10                 | 2 | 0  | 0 | 500   |
| DN-7   | 195              | 132              | 36                    | 123                   | 486                | 0  | 0 | 0                  | 5              | 2              | 5              | 12                 | 0 | 2  | 0 | 500   |

|        |     |     |    |    |     |    |   |    |   |   |    |    |    |    |    |     |
|--------|-----|-----|----|----|-----|----|---|----|---|---|----|----|----|----|----|-----|
| DN-9   | 424 | 34  | 10 | 6  | 474 | 0  | 0 | 0  | 0 | 0 | 0  | 0  | 6  | 16 | 4  | 500 |
| DN-13  | 338 | 100 | 40 | 5  | 483 | 0  | 0 | 0  | 2 | 0 | 2  | 4  | 0  | 13 | 0  | 500 |
| DN-14  | 406 | 48  | 20 | 4  | 478 | 0  | 0 | 0  | 0 | 0 | 0  | 0  | 8  | 12 | 2  | 500 |
| DN-16  | 375 | 103 | 12 | 5  | 495 | 0  | 0 | 0  | 0 | 5 | 0  | 5  | 0  | 0  | 0  | 500 |
| DN-19  | 458 | 12  | 8  | 0  | 478 | 0  | 0 | 0  | 0 | 0 | 0  | 0  | 7  | 10 | 5  | 500 |
| DN-21  | 400 | 30  | 28 | 6  | 464 | 0  | 0 | 0  | 4 | 0 | 0  | 4  | 14 | 18 | 0  | 500 |
| DN-25  | 366 | 63  | 24 | 6  | 459 | 4  | 0 | 4  | 8 | 4 | 4  | 16 | 0  | 14 | 7  | 500 |
| DN-26  | 428 | 44  | 18 | 2  | 492 | 2  | 0 | 2  | 4 | 0 | 0  | 4  | 0  | 2  | 0  | 500 |
| DN-27  | 426 | 53  | 17 | 2  | 498 | 0  | 0 | 0  | 0 | 0 | 2  | 2  | 0  | 0  | 0  | 500 |
| DN-28  | 336 | 98  | 42 | 6  | 482 | 4  | 0 | 4  | 2 | 0 | 2  | 4  | 0  | 2  | 8  | 500 |
| DN-29  | 348 | 123 | 11 | 2  | 484 | 0  | 0 | 0  | 7 | 0 | 9  | 16 | 0  | 0  | 0  | 500 |
| DN-31  | 476 | 16  | 4  | 2  | 498 | 0  | 0 | 0  | 0 | 0 | 0  | 0  | 0  | 2  | 0  | 500 |
| DN-32  | 318 | 154 | 18 | 8  | 498 | 0  | 0 | 0  | 0 | 2 | 0  | 2  | 0  | 0  | 0  | 500 |
| DN-34  | 334 | 82  | 12 | 6  | 434 | 0  | 0 | 0  | 2 | 0 | 0  | 2  | 4  | 0  | 60 | 500 |
| DN-38  | 460 | 24  | 8  | 4  | 496 | 0  | 0 | 0  | 0 | 0 | 0  | 0  | 0  | 4  | 0  | 500 |
| DN-39  | 376 | 89  | 27 | 4  | 496 | 0  | 0 | 0  | 2 | 0 | 2  | 4  | 0  | 0  | 0  | 500 |
| DN-40  | 440 | 24  | 16 | 4  | 484 | 0  | 0 | 0  | 2 | 0 | 6  | 8  | 0  | 0  | 8  | 500 |
| DN-41  | 366 | 120 | 10 | 2  | 498 | 0  | 0 | 0  | 2 | 0 | 0  | 2  | 0  | 0  | 0  | 500 |
| DN-42  | 384 | 88  | 14 | 10 | 496 | 0  | 0 | 0  | 2 | 0 | 0  | 2  | 0  | 0  | 2  | 500 |
| DN-43  | 432 | 54  | 6  | 0  | 492 | 0  | 0 | 0  | 2 | 0 | 0  | 2  | 0  | 4  | 2  | 500 |
| ZS-1   | 454 | 28  | 16 | 2  | 500 | 0  | 0 | 0  | 0 | 0 | 0  | 0  | 0  | 0  | 0  | 500 |
| ZS-2   | 455 | 14  | 25 | 2  | 496 | 0  | 0 | 0  | 2 | 0 | 0  | 2  | 0  | 2  | 0  | 500 |
| ZS-3   | 458 | 26  | 10 | 4  | 498 | 0  | 0 | 0  | 0 | 0 | 0  | 0  | 0  | 2  | 0  | 500 |
| ZS-4   | 454 | 34  | 2  | 2  | 492 | 0  | 0 | 0  | 0 | 0 | 0  | 0  | 0  | 2  | 6  | 500 |
| ZS-5   | 460 | 32  | 4  | 4  | 500 | 0  | 0 | 0  | 0 | 0 | 0  | 0  | 0  | 0  | 0  | 500 |
| ZS-6   | 482 | 12  | 4  | 2  | 500 | 0  | 0 | 0  | 0 | 0 | 0  | 0  | 0  | 0  | 0  | 500 |
| ZS-8   | 486 | 4   | 0  | 2  | 492 | 0  | 0 | 0  | 0 | 0 | 0  | 0  | 0  | 6  | 2  | 500 |
| ZS-9   | 486 | 4   | 0  | 0  | 490 | 0  | 0 | 0  | 0 | 0 | 0  | 0  | 0  | 2  | 8  | 500 |
| ZS-11  | 478 | 12  | 10 | 0  | 500 | 0  | 0 | 0  | 0 | 0 | 0  | 0  | 0  | 0  | 0  | 500 |
| ZS-12  | 482 | 8   | 4  | 2  | 496 | 0  | 0 | 0  | 0 | 0 | 0  | 0  | 0  | 4  | 0  | 500 |
| ZS-13  | 456 | 34  | 4  | 2  | 496 | 0  | 0 | 0  | 0 | 0 | 0  | 0  | 0  | 0  | 4  | 500 |
| DZ-2   | 472 | 22  | 2  | 0  | 496 | 0  | 0 | 0  | 0 | 0 | 0  | 0  | 0  | 0  | 4  | 500 |
| DZ-12  | 445 | 30  | 20 | 0  | 495 | 0  | 0 | 0  | 0 | 0 | 0  | 0  | 0  | 0  | 5  | 500 |
| DZ-13  | 442 | 14  | 12 | 4  | 472 | 0  | 0 | 0  | 0 | 0 | 0  | 0  | 0  | 0  | 28 | 500 |
| DZ-15  | 465 | 25  | 5  | 0  | 495 | 0  | 0 | 0  | 0 | 0 | 0  | 0  | 5  | 0  | 0  | 500 |
| DZ-18a | 480 | 5   | 15 | 0  | 500 | 0  | 0 | 0  | 0 | 0 | 0  | 0  | 0  | 0  | 0  | 500 |
| DZ-19  | 445 | 30  | 10 | 5  | 490 | 10 | 0 | 10 | 0 | 0 | 0  | 0  | 0  | 0  | 0  | 500 |
| DZ-21  | 412 | 28  | 8  | 10 | 458 | 0  | 0 | 0  | 2 | 0 | 16 | 18 | 0  | 6  | 18 | 500 |
| DZ-23  | 460 | 30  | 6  | 0  | 496 | 2  | 0 | 2  | 0 | 0 | 0  | 0  | 0  | 2  | 0  | 500 |
| DZ-26  | 440 | 52  | 2  | 4  | 498 | 0  | 0 | 0  | 0 | 0 | 0  | 0  | 0  | 2  | 0  | 500 |
| GKS-3  | 476 | 18  | 2  | 2  | 498 | 0  | 0 | 0  | 0 | 0 | 0  | 0  | 2  | 0  | 0  | 500 |
| GKS-4  | 422 | 52  | 16 | 6  | 496 | 0  | 0 | 0  | 0 | 4 | 0  | 4  | 0  | 0  | 0  | 500 |
| GKS-6  | 444 | 46  | 6  | 0  | 496 | 0  | 0 | 0  | 0 | 0 | 0  | 0  | 4  | 0  | 0  | 500 |
| GKS-8  | 444 | 24  | 2  | 2  | 472 | 0  | 0 | 0  | 0 | 0 | 0  | 0  | 28 | 0  | 0  | 500 |

|        |     |     |    |    |     |   |   |   |   |   |   |   |    |    |   |     |
|--------|-----|-----|----|----|-----|---|---|---|---|---|---|---|----|----|---|-----|
| GKS-10 | 480 | 10  | 4  | 0  | 494 | 0 | 0 | 0 | 0 | 0 | 0 | 0 | 6  | 0  | 0 | 500 |
| GKS-12 | 332 | 108 | 28 | 20 | 488 | 2 | 0 | 2 | 2 | 2 | 0 | 4 | 0  | 0  | 6 | 500 |
| GKS-18 | 485 | 15  | 0  | 0  | 500 | 0 | 0 | 0 | 0 | 0 | 0 | 0 | 0  | 0  | 0 | 500 |
| GKS-19 | 460 | 20  | 5  | 0  | 485 | 0 | 0 | 0 | 0 | 0 | 0 | 0 | 10 | 5  | 0 | 500 |
| GKS-20 | 444 | 22  | 12 | 2  | 480 | 0 | 0 | 0 | 0 | 0 | 0 | 0 | 0  | 20 | 0 | 500 |
| GKS-22 | 474 | 12  | 0  | 0  | 486 | 0 | 0 | 0 | 0 | 0 | 0 | 0 | 6  | 4  | 4 | 500 |
| GKS-26 | 458 | 34  | 4  | 2  | 498 | 0 | 0 | 0 | 0 | 0 | 0 | 0 | 0  | 2  | 0 | 500 |
| GKS-31 | 490 | 0   | 0  | 0  | 490 | 0 | 0 | 0 | 0 | 0 | 0 | 0 | 10 | 0  | 0 | 500 |
| SD-1   | 450 | 45  | 0  | 0  | 495 | 0 | 0 | 0 | 0 | 0 | 0 | 0 | 0  | 5  | 0 | 500 |
| SD-4   | 348 | 98  | 36 | 10 | 492 | 2 | 0 | 2 | 0 | 0 | 0 | 0 | 0  | 4  | 2 | 500 |
| SD-5   | 482 | 8   | 2  | 2  | 494 | 0 | 0 | 0 | 0 | 0 | 0 | 0 | 0  | 4  | 2 | 500 |
| SD-6   | 427 | 60  | 13 | 0  | 500 | 0 | 0 | 0 | 0 | 0 | 0 | 0 | 0  | 0  | 0 | 500 |
| SD-9   | 448 | 40  | 10 | 2  | 500 | 0 | 0 | 0 | 0 | 0 | 0 | 0 | 0  | 0  | 0 | 500 |
| SD-10  | 372 | 98  | 20 | 8  | 498 | 0 | 0 | 0 | 0 | 2 | 0 | 2 | 0  | 0  | 0 | 500 |
