# Supplementary material
Source: MDPI journal article supplement (https://www.mdpi.com/2075-163X/11/6/573)
Supplement: s1 [file s1]

| Samples | SiO <sub>2</sub> | Al <sub>2</sub> O <sub>3</sub> | Fe <sub>2</sub> O <sub>3</sub> | MgO   | CaO   | Na <sub>2</sub> O | K <sub>2</sub> O | TiO <sub>2</sub> | Sc | LOI  | Sum   | Co   | Hf   | Nb   | Th   | U    | Zr     | La    | Nd    | Sm    | Zn | Ni   |
|---------|------------------|--------------------------------|--------------------------------|-------|-------|-------------------|------------------|------------------|----|------|-------|------|------|------|------|------|--------|-------|-------|-------|----|------|
|         | %                | %                              | %                              | %     | %     | %                 | %                | %                | p  | %    | %     | p    | p    | p    | p    | p    | p      | p     | p     | p     | p  | p    |
| DK-T    | 1.25             | 0.5                            | 0.9                            | 19.27 | 31.17 | 0.02              | 0.11             | 0.02             | 1  | 46.3 | 99.66 | 5.6  | 0.1  | 0.6  | 1.3  | 1    | 5.1    | 5.9   | 7.9   | 1.48  | 18 | 4.9  |
| DK-F    | 1.64             | 0.52                           | 2.13                           | 16.8  | 33.29 | 0.02              | 0.13             | 0.03             | 1  | 44.3 | 99.7  | 10.4 | 0.2  | 0.8  | 0.9  | 2.4  | 7      | 12.1  | 10.5  | 1.52  | 41 | 10.9 |
| DK-F    | 1.6              | 0.52                           | 2.21                           | 17.14 | 33.05 | 0.02              | 0.13             | 0.03             | 1  | 44.4 | 99.95 | 12.5 | 0.2  | 1.5  | 0.8  | 2.3  | 7.6    | 15.4  | 11.4  | 1.75  | 40 | 11.4 |
| DK-K    | 4.31             | 1.52                           | 2.13                           | 17.11 | 30.69 | 0.02              | 0.39             | 0.07             | 2  | 43.6 | 99.95 | 8.1  | 0.4  | 1.6  | 1.4  | 1.7  | 16.8   | 5.4   | 3.7   | 0.61  | 32 | 9.2  |
| KF-1    | 93.84            | 2.95                           | 0.55                           | 0.06  | 0.42  | 0.01              | 0.01             | 0.21             | 3  | 1.8  | 99.9  | 3.3  | 3.7  | 6.5  | 5.1  | 1    | 140.6  | 26.7  | 41    | 5.94  | 6  | 8.5  |
| KF-2    | 93.88            | 3.05                           | 1.03                           | 0.02  | 0.14  | 0.01              | 0.02             | 0.41             | 5  | 1.3  | 99.93 | 4.2  | 10.2 | 9.3  | 13.8 | 2.1  | 395.6  | 28.4  | 23.2  | 4.4   | 8  | 8.1  |
| KF-3    | 86.76            | 7.59                           | 0.98                           | 0.04  | 0.07  | 0.01              | 0.03             | 0.78             | 9  | 3.4  | 99.77 | 2.4  | 21.8 | 18.7 | 41.6 | 3.5  | 828.5  | 74.8  | 57.5  | 10.76 | 3  | 5.4  |
| KF-4    | 92.81            | 2.19                           | 2.39                           | 0.04  | 0.06  | 0.01              | 0.01             | 0.76             | 12 | 1.5  | 99.79 | 9.4  | 28.7 | 19.1 | 18   | 5.1  | 1051.2 | 5.6   | 4.4   | 1.73  | 19 | 11.6 |
| KF-5    | 90.13            | 5.41                           | 1.01                           | 0.03  | 0.12  | 0.02              | 0.01             | 0.44             | 4  | 2.6  | 99.87 | 3    | 6.2  | 10.7 | 14.2 | 1.3  | 230.4  | 54.8  | 39.3  | 4.73  | 5  | 7.1  |
| KF-6    | 85.12            | 8.1                            | 2.32                           | 0.03  | 0.06  | 0.01              | 0.02             | 0.98             | 10 | 3.1  | 99.81 | 2.7  | 30.5 | 22.5 | 29.3 | 3.8  | 1158.6 | 23.9  | 15.9  | 3.69  | 4  | 5.4  |
| KF-7    | 92.72            | 3.77                           | 1.31                           | 0.02  | 0.08  | 0.01              | 0.02             | 0.35             | 3  | 1.6  | 99.95 | 2.7  | 7.1  | 8.3  | 13.6 | 1.2  | 277    | 24.1  | 16.6  | 3.05  | 6  | 8.2  |
| KF-8    | 88.01            | 6.77                           | 0.95                           | 0.03  | 0.08  | 0.01              | 0.04             | 1                | 8  | 2.9  | 99.81 | 3.3  | 18.3 | 21.1 | 33.9 | 4    | 692.7  | 51.5  | 37.5  | 6.5   | 4  | 6.1  |
| KF-10   | 91.62            | 4.66                           | 1.23                           | 0.01  | 0.03  | 0.01              | 0.01             | 0.32             | 3  | 2    | 99.9  | 2.7  | 3.9  | 7.8  | 8.8  | 0.9  | 145.8  | 34.5  | 22.7  | 2.62  | 4  | 8.2  |
| KF-11   | 74.42            | 16.05                          | 0.93                           | 0.04  | 0.06  | 0.02              | 0.1              | 1.34             | 11 | 6.4  | 99.59 | 2.5  | 20.8 | 33   | 75.2 | 11.5 | 778.8  | 188.2 | 661.2 | 206.4 | 2  | 5    |
| KF-13   | 93.04            | 3.68                           | 0.58                           | 0.02  | 0.1   | 0.01              | 0.04             | 0.71             | 4  | 1.7  | 99.93 | 1.5  | 10.8 | 16.1 | 22.9 | 3.2  | 420.8  | 30.2  | 21.3  | 3.78  | 2  | 3.8  |
| KF-14   | 53.53            | 11.32                          | 25.84                          | 0.07  | 0.17  | 0.02              | 0.12             | 2.22             | 40 | 6.1  | 99.56 | 48.5 | 51.4 | 40.7 | 88.1 | 15.3 | 1909   | 127.5 | 94.5  | 17.9  | 97 | 62.8 |
| KL-1    | 30.72            | 35.02                          | 18.4                           | 0.03  | 0.04  | 0.02              | 0.07             | 2.46             | 43 | 12.9 | 99.79 | 6.6  | 19.7 | 46   | 42.9 | 8.4  | 715.6  | 16.2  | 16.5  | 3.23  | 14 | 15.4 |
| KL-2    | 40.15            | 34.83                          | 9.82                           | 0.02  | 0.04  | 0.02              | 0.02             | 1.91             | 30 | 13   | 99.87 | 4.2  | 12.4 | 34.4 | 28.4 | 5    | 457.8  | 8.3   | 21.8  | 5.19  | 5  | 15.3 |
| KL-3    | 35.93            | 30.74                          | 19                             | 0.04  | 0.07  | 0.02              | 0.14             | 2                | 33 | 11.7 | 99.74 | 5.7  | 20.9 | 37   | 37.5 | 6.3  | 770.8  | 63.9  | 57.7  | 10.75 | 9  | 7.9  |
| KL-5    | 14.68            | 53.09                          | 13.9                           | 0.09  | 0.15  | 0.01              | 0.06             | 3.41             | 73 | 14.2 | 99.71 | 5.5  | 24.8 | 62.5 | 52   | 19.5 | 933.9  | 20.3  | 29.3  | 6.15  | 38 | 29   |
| KL-7    | 46.38            | 35.25                          | 0.51                           | 0.07  | 0.11  | 0.02              | 0.03             | 3.4              | 21 | 13.9 | 99.72 | 1.3  | 38.2 | 65.3 | 42.5 | 7    | 1386.6 | 11.6  | 8     | 2.08  | 1  | 1.2  |
| DK-a    | 79.21            | 10.63                          | 4.19                           | 0.07  | 0.16  | 0.01              | 0.08             | 0.55             | 10 | 4.9  | 99.88 | 2    | 6.5  | 12.3 | 18.9 | 2.1  | 228.1  | 18.7  | 17.4  | 2.83  | 2  | 5.8  |
| DK-b    | 95.29            | 2.24                           | 0.99                           | 0.04  | 0.05  | 0.01              | 0.03             | 0.12             | 2  | 1.1  | 99.93 | 2.1  | 2.2  | 3    | 3.5  | 0.6  | 83.2   | 7.6   | 5.3   | 0.97  | 4  | 8.4  |
| DK-c    | 93.93            | 1.69                           | 0.82                           | 0.07  | 0.9   | 0.02              | 0.27             | 0.24             | 2  | 1.9  | 99.9  | 2.8  | 5.8  | 4.8  | 4    | 1    | 227.9  | 10.7  | 8.1   | 1.3   | 6  | 9.6  |
| DK-d    | 91.09            | 3.13                           | 1.48                           | 0.14  | 0.31  | 0.02              | 0.47             | 0.49             | 4  | 2.6  | 99.85 | 1.9  | 13.6 | 8.5  | 9.1  | 1.6  | 525.6  | 18.1  | 13.3  | 2.26  | 3  | 6    |
| DK-E    | 43.5             | 12.95                          | 33.91                          | 0.1   | 1.31  | 0.03              | 0.36             | 0.98             | 28 | 5.9  | 99.76 | 2.7  | 11   | 17.6 | 25.5 | 5.5  | 410.1  | 16.1  | 12.4  | 4.32  | 16 | 7.9  |
| KW-1    | 48.34            | 8.62                           | 29.21                          | 0.2   | 0.51  | 0.07              | 0.45             | 0.76             | 20 | 11.2 | 99.78 | 2.5  | 10.5 | 14.7 | 44.1 | 6.8  | 408.1  | 22.1  | 20.5  | 3.52  | 37 | 2.8  |
| DK-P1   | 53.65            | 24.84                          | 3.13                           | 1.25  | 0.64  | 0.08              | 3.55             | 1.19             | 20 | 11.3 | 99.81 | 6.4  | 7.7  | 26.9 | 28   | 2.7  | 265.8  | 72.7  | 50.4  | 7.62  | 6  | 6.7  |
| DK-P2   | 29.71            | 12.18                          | 4.22                           | 8.23  | 16.12 | 0.06              | 1.84             | 0.64             | 15 | 26.7 | 99.88 | 13.4 | 3.7  | 13   | 13.8 | 1.1  | 131.1  | 37.4  | 30.7  | 5.91  | 11 | 13.3 |
| DK-P3   | 49.18            | 19.13                          | 4.03                           | 3.25  | 5.21  | 0.07              | 2.86             | 1.09             | 18 | 14.9 | 99.84 | 13   | 6.7  | 23.6 | 22.9 | 2.6  | 243.3  | 60.4  | 45.3  | 7.65  | 10 | 15.8 |
| KK-1    | 52.74            | 15.9                           | 5.17                           | 2.46  | 1.44  | 0.4               | 4.6              | 1.12             | 11 | 15.9 | 99.85 | 11.5 | 9.7  | 25.3 | 24.2 | 18.5 | 345.7  | 27.1  | 13.6  | 2.21  | 13 | 22.6 |

|          |       |       |       |       |       |      |      |      |    |      |        |       |      |      |      |      |       |       |        |        |     |      |
|----------|-------|-------|-------|-------|-------|------|------|------|----|------|--------|-------|------|------|------|------|-------|-------|--------|--------|-----|------|
| KK-2     | 28.42 | 12.21 | 4.13  | 11.12 | 13.38 | 0.31 | 3.1  | 0.62 | 9  | 26.4 | 99.89  | 10.7  | 3.5  | 14.2 | 14.5 | 9.1  | 124.8 | 24.7  | 13.3   | 2.1    | 10  | 18.3 |
| KK-3     | 44.62 | 19.18 | 5.99  | 4.85  | 3.48  | 0.31 | 4.87 | 0.85 | 15 | 15.3 | 99.87  | 14    | 4.7  | 19.5 | 18.4 | 8.7  | 165.1 | 34.4  | 20.8   | 3.77   | 11  | 22.6 |
| KK-4     | 42.09 | 18.24 | 5.69  | 5.43  | 4.83  | 0.89 | 5.05 | 1.05 | 12 | 16.4 | 99.83  | 14.1  | 8.2  | 24.4 | 22.4 | 11.2 | 306   | 30.1  | 16     | 2.73   | 11  | 17.6 |
| DKA-10   | 53.6  | 19.59 | 7     | 2.65  | 0.44  | 0.08 | 6.31 | 1.07 | 15 | 8.7  | 99.76  | 238   | 8.9  | 26.5 | 23.7 | 1.8  | 320.7 | 55.3  | 31.1   | 4.01   | 39  | 100  |
| DKA-11   | 53.2  | 20.04 | 6.69  | 2.56  | 0.38  | 0.07 | 6.27 | 1.04 | 16 | 9.1  | 99.76  | 271.9 | 7.5  | 23.8 | 19.9 | 1.8  | 264.7 | 48    | 36.4   | 6.61   | 54  | 84.2 |
| Dka - 12 | 52.68 | 19.75 | 6.5   | 2.57  | 0.31  | 0.08 | 6.12 | 1.03 | 17 | 10.2 | 99.73  | 246.5 | 7.8  | 26.8 | 27.7 | 2.5  | 287.7 | 67.8  | 61.6   | 12.98  | 188 | 58   |
| DKA-13   | 53.78 | 20.51 | 4.82  | 1.82  | 0.33  | 0.06 | 4.79 | 0.99 | 23 | 9.5  | 98.62  | 51.6  | 16.5 | 23.8 | 27.5 | 18.9 | 633.1 | 790.9 | 2161.1 | 487.19 | 172 | 26.4 |
| DN-1a    | 6.31  | 0.58  | 4.55  | 0.18  | 9.57  | 0.03 | 0.04 | 0.05 | 3  | 67.7 | 89.59  | 1.5   | 1.5  | 1.4  | 0.8  | 4.4  | 70.8  | 5.3   | 39     | 17.59  | 9   | 3.4  |
| DN-1d    | 62.09 | 20.99 | 1.08  | 0.31  | 0.03  | 0.06 | 0.94 | 3.27 | 24 | 10.8 | 99.71  | 9.1   | 26.2 | 60.9 | 30.9 | 15   | 954.6 | 60.9  | 42.7   | 7.43   | 6   | 9    |
| DN-1j    | 58.9  | 1.87  | 28.18 | 0.77  | 1.54  | 0.01 | 0.1  | 0.38 | 17 | 7.5  | 99.88  | 34.3  | 6.3  | 6    | 5.4  | 1.3  | 241.8 | 8.5   | 8.4    | 2.14   | 19  | 21.7 |
| DN-1     | 89.22 | 3.45  | 0.75  | 0.03  | 0.08  | 0.06 | 0.13 | 0.38 | 3  | 5.8  | 99.96  | 2.4   | 5.9  | 8.3  | 11.4 | 1.5  | 207.7 | 14.6  | 12.8   | 2.38   | 3   | 7.4  |
| DN-4     | 93.18 | 1.7   | 0.83  | 0.17  | 0.03  | 0.05 | 0.08 | 1.16 | 4  | 2.5  | 99.84  | 2.8   | 28.4 | 20.8 | 20.3 | 3.7  | 1051  | 32.3  | 28.3   | 4.85   | 7   | 9.9  |
| DN-5     | 63.28 | 1.39  | 28.42 | 0.07  | 0.35  | 0.01 | 0.1  | 0.08 | 12 | 5.8  | 99.91  | 23.9  | 1.4  | 2.1  | 3.6  | 0.4  | 50.4  | 5.3   | 5      | 1.21   | 44  | 24.9 |
| DN8      | 58.23 | 22.67 | 0.84  | 0.2   | 0.04  | 0.04 | 0.62 | 2.26 | 21 | 14.8 | 99.75  | 9.7   | 17.4 | 41.4 | 26.9 | 10.8 | 638.4 | 108.8 | 179.1  | 40.9   | 40  | 20.4 |
| DN8a     | 54.95 | 24.92 | 1.91  | 0.38  | 0.05  | 0.07 | 1.16 | 3.52 | 27 | 12.7 | 99.76  | 8.1   | 22.7 | 63.8 | 33.5 | 13.3 | 839.5 | 56.3  | 35.2   | 6.19   | 8   | 7.3  |
| DN-11    | 7.86  | 4.15  | 10.39 | 12.04 | 25.55 | 0.02 | 0.44 | 0.24 | 6  | 38.9 | 99.94  | 7.4   | 1.3  | 4.9  | 4.3  | 0.4  | 45.9  | 14.3  | 11.4   | 2.04   | 35  | 6.2  |
| DN12     | 50.69 | 21.51 | 6.54  | 0.58  | 0.08  | 0.11 | 2.14 | 1.38 | 19 | 16.6 | 99.82  | 7.2   | 10.8 | 24.7 | 27.3 | 3.9  | 366.4 | 69.5  | 49.1   | 6.98   | 34  | 6.2  |
| DN-16    | 46.24 | 2.21  | 5.75  | 7.24  | 15.82 | 0.01 | 0.2  | 0.21 | 5  | 22.1 | 99.91  | 7.1   | 1.6  | 3.8  | 5    | 0.4  | 67.1  | 17.4  | 18.4   | 3.69   | 11  | 15.8 |
| DN16a    | 50.62 | 26.4  | 4.55  | 0.86  | 0.27  | 0.12 | 3.21 | 1.38 | 24 | 12.1 | 99.79  | 26.4  | 7.8  | 27.1 | 24.4 | 2.3  | 260.6 | 80.8  | 62.6   | 8.69   | 19  | 10.8 |
| DN17     | 73.95 | 14.21 | 1.55  | 0.43  | 0.12  | 0.08 | 2.58 | 1.18 | 12 | 5.6  | 99.82  | 7.2   | 16.2 | 21.8 | 19.3 | 3.3  | 592.2 | 48.2  | 40.1   | 7.13   | 31  | 3.3  |
| DN-19    | 73.62 | 2.14  | 2.96  | 2.99  | 6.78  | 0.02 | 0.27 | 0.63 | 5  | 10.4 | 99.89  | 5.3   | 8.6  | 10.3 | 7.5  | 1.8  | 311.5 | 15.7  | 15.5   | 3.24   | 50  | 8.3  |
| DN22     | 74.69 | 14.02 | 1.31  | 0.33  | 0.05  | 0.07 | 1.94 | 1.35 | 13 | 6    | 99.85  | 3.1   | 13   | 23.8 | 20.6 | 3.1  | 461.6 | 47.5  | 40.7   | 7.18   | 13  | 1.8  |
| DN24     | 63.46 | 15.22 | 2.46  | 0.3   | 0.02  | 0.04 | 0.66 | 1.57 | 19 | 16   | 99.84  | 22.8  | 14.3 | 26.7 | 23   | 4.4  | 521.9 | 42    | 34.2   | 7.39   | 117 | 52.3 |
| DN30     | 74.44 | 9.92  | 4.27  | 0.35  | 0.05  | 0.05 | 1.59 | 1.41 | 12 | 7.8  | 99.87  | 2.4   | 13.3 | 23.2 | 17   | 3.4  | 457   | 37.6  | 29.8   | 4.94   | 10  | 1.7  |
| DN-35    | 12.01 | 3.02  | 6.04  | 12.29 | 26.48 | 0.04 | 0.24 | 0.22 | 4  | 39.5 | 99.93  | 3.9   | 2.1  | 3.9  | 3.8  | 0.6  | 76.2  | 10.8  | 9      | 1.69   | 18  | 5.5  |
| DN-37    | 89.56 | 3.25  | 1.34  | 0.28  | 0.05  | 0.03 | 0.61 | 0.62 | 4  | 4.2  | 99.94  | 3.4   | 10.5 | 10   | 9.3  | 1.5  | 378.6 | 18.8  | 13.7   | 2.31   | 17  | 5.2  |
| KK-1a    | 87.17 | 1.29  | 2.1   | 0.09  | 4.27  | 0.03 | 0.41 | 0.42 | 8  | 1.1  | 99.86  | 3.4   | 12.7 | 8.6  | 34.2 | 4.9  | 504.3 | 69.8  | 80.7   | 17.51  | 45  | 22.1 |
| KK-2a    | 88.77 | 4.24  | 2.74  | 0.17  | 0.17  | 0.02 | 0.81 | 0.4  | 6  | 2.4  | 99.95  | 7.8   | 6.3  | 7.8  | 8.8  | 1.7  | 252.2 | 21.3  | 20.9   | 3.91   | 29  | 18.4 |
| KK-3a    | 98.87 | 0.14  | 0.64  | 0.01  | 0.03  | 0.01 | 0.02 | 0.02 | 1  | 0.2  | 100.02 | 3     | 0.9  | 2.3  | 0.7  | 0.1  | 30.5  | 2.6   | 1.8    | 0.2    | 6   | 12.3 |
| KK-4a    | 94.92 | 2.35  | 0.53  | 0.09  | 0.13  | 0.01 | 0.5  | 0.44 | 4  | 0.9  | 99.94  | 1.6   | 9.1  | 8.6  | 5.7  | 1.3  | 360.4 | 12.6  | 7.8    | 1.33   | 2   | 6.5  |
| KK-6a    | 83.66 | 2.93  | 3.88  | 0.78  | 2.62  | 0.01 | 0.6  | 0.38 | 7  | 4.8  | 99.86  | 3.7   | 7.6  | 7.2  | 5.6  | 1.7  | 302.4 | 11.4  | 12.2   | 2.7    | 6   | 9.9  |
| KK-7a    | 95.4  | 2.12  | 0.6   | 0.06  | 0.06  | 0.02 | 0.36 | 0.49 | 3  | 0.8  | 99.95  | 1.9   | 8.6  | 9.1  | 5.3  | 1.3  | 339.8 | 11.5  | 9.1    | 1.45   | 5   | 7.2  |
| GKK-1    | 16.61 | 6.96  | 2.79  | 15.27 | 20.86 | 0.05 | 1.99 | 0.35 | 9  | 34.9 | 99.92  | 10.3  | 1.9  | 7.9  | 6.9  | 4.7  | 66.3  | 17.8  | 12.7   | 2.09   | 9   | 19.4 |

|        |       |       |       |       |       |      |      |      |    |      |       |       |      |      |       |      |        |       |       |       |      |       |
|--------|-------|-------|-------|-------|-------|------|------|------|----|------|-------|-------|------|------|-------|------|--------|-------|-------|-------|------|-------|
| GKK-2  | 23.34 | 9.26  | 3.45  | 12.55 | 18.1  | 0.1  | 2.61 | 0.54 | 6  | 29.8 | 99.89 | 12.7  | 3.5  | 12.4 | 13.2  | 17.1 | 124.5  | 23.5  | 11    | 1.68  | 13   | 17.9  |
| GKK-3  | 54.88 | 18.56 | 4.78  | 3.08  | 0.99  | 0.09 | 5.49 | 1.12 | 12 | 10.6 | 99.79 | 20.7  | 12.2 | 25   | 27    | 11.4 | 450.5  | 57.5  | 27.4  | 3.8   | 9    | 25.2  |
| GKS-1A | 27.52 | 13.4  | 32.37 | 2.21  | 1.31  | 0.05 | 3.66 | 0.58 | 22 | 17.6 | 99.59 | 279.2 | 5.7  | 12.1 | 18.8  | 5.8  | 223.7  | 41.4  | 52.7  | 17.81 | 1322 | 202.3 |
| GKS-1B | 44.1  | 22.66 | 5.48  | 2.06  | 1.4   | 0.06 | 4.56 | 1.07 | 16 | 17.5 | 99.66 | 69.4  | 9.1  | 23.7 | 36.1  | 7.7  | 345.8  | 105.6 | 78.5  | 21.24 | 165  | 102.5 |
| GKS-2  | 33.42 | 6.22  | 4.71  | 0.14  | 1.19  | 0.15 | 0.37 | 0.86 | 8  | 52.7 | 99.8  | 3.4   | 16.4 | 16.6 | 35    | 34.4 | 574.7  | 45.6  | 39.7  | 7.02  | 5    | 6.1   |
| GKS-4  | 94.44 | 2.41  | 0.36  | 0.02  | 0.49  | 0.01 | 0.03 | 0.21 | 1  | 2    | 99.98 | 2.1   | 3.6  | 4.9  | 6.4   | 0.9  | 124.6  | 15.7  | 14.2  | 1.87  | 5    | 6.5   |
| GKS-5  | 53.74 | 28.25 | 1.56  | 0.28  | 0.3   | 0.09 | 0.87 | 1.48 | 16 | 13.1 | 99.78 | 51.7  | 16.8 | 33.2 | 50.6  | 10.8 | 598    | 122.1 | 89.8  | 14.01 | 27   | 38.3  |
| GKS-6  | 92.68 | 3.56  | 0.55  | 0.03  | 0.04  | 0.01 | 0.1  | 1.2  | 6  | 1.5  | 99.69 | 2.7   | 44.5 | 22.6 | 76.8  | 8.6  | 1665.6 | 111.4 | 106.8 | 19.81 | 5    | 5.3   |
| GKS-7  | 53.46 | 27.32 | 4.21  | 0.26  | 0.49  | 0.08 | 0.68 | 1.38 | 18 | 11.7 | 99.76 | 9.3   | 11   | 29.7 | 50    | 4    | 409.5  | 124.2 | 76.5  | 11.35 | 6    | 8.9   |
| GKS-8  | 80.69 | 11.66 | 0.67  | 0.07  | 0.06  | 0.01 | 0.25 | 1.51 | 10 | 4.7  | 99.76 | 2.7   | 34.1 | 29.6 | 61.5  | 6    | 1235.9 | 96.9  | 71.7  | 12.05 | 3    | 4.7   |
| GKS-12 | 96.48 | 1.27  | 1.17  | 0.02  | 0.03  | 0.01 | 0.01 | 0.32 | 1  | 0.6  | 99.95 | 9     | 7.5  | 6.8  | 16.2  | 2.1  | 292.8  | 25.4  | 25.2  | 4.81  | 26   | 14.9  |
| GKS-16 | 81.29 | 11.82 | 0.67  | 0.02  | 0.03  | 0.01 | 0.01 | 1.05 | 8  | 4.9  | 99.87 | 3.5   | 16.3 | 21.3 | 32.8  | 6.9  | 582.5  | 96.1  | 62.2  | 7.13  | 1    | 3     |
| GKS-17 | 67.05 | 16.94 | 7.19  | 0.06  | 0.06  | 0.03 | 0.23 | 1.44 | 17 | 6.7  | 99.79 | 3.4   | 21.9 | 29.9 | 51.2  | 5.4  | 808.5  | 104.6 | 65.1  | 8.05  | 5    | 4.1   |
| GKS-18 | 63.63 | 20.62 | 5.6   | 0.06  | 0.08  | 0.02 | 0.12 | 1.1  | 14 | 8.6  | 99.88 | 6.4   | 11.1 | 23.2 | 29.5  | 2.3  | 426    | 40.5  | 27.8  | 4.33  | 2    | 11.4  |
| GKS-21 | 47.96 | 24.38 | 16.62 | 0.04  | 0.08  | 0.02 | 0.17 | 1.13 | 24 | 9.3  | 99.83 | 2.6   | 8.6  | 23.7 | 31.3  | 3.6  | 316.5  | 61.7  | 19.3  | 2.73  | 2    | 2     |
| GKS-22 | 78.45 | 12.51 | 2.04  | 0.04  | 0.04  | 0.01 | 0.12 | 1.3  | 13 | 5.2  | 99.79 | 2.1   | 23.2 | 25.2 | 32.3  | 3.2  | 859.3  | 29.8  | 9.8   | 2.13  | 3    | 3.6   |
| GKS-23 | 59.81 | 22.24 | 1.48  | 0.22  | 0.02  | 0.06 | 0.92 | 2.1  | 23 | 12.8 | 99.78 | 10.6  | 17.8 | 36.9 | 26.8  | 6.4  | 644.4  | 45.2  | 34.8  | 5.96  | 19   | 11.9  |
| GKS-26 | 93.06 | 1.81  | 2.52  | 0.02  | 0.03  | 0.02 | 0.06 | 0.6  | 3  | 1.7  | 99.93 | 1.9   | 12.1 | 10.5 | 8.1   | 1.5  | 455.4  | 11.6  | 9.8   | 2.14  | 6    | 4.1   |
| GKS-27 | 8.25  | 4.47  | 10.49 | 11.48 | 26.52 | 0.02 | 0.34 | 0.24 | 10 | 37.8 | 99.91 | 10.7  | 2    | 4.7  | 6.6   | 0.4  | 81.3   | 27.4  | 24.6  | 4.66  | 29   | 8.5   |
| GKS-29 | 57.86 | 24.75 | 1.86  | 0.54  | 0.72  | 0.08 | 1.96 | 1.33 | 23 | 10.6 | 99.83 | 9.1   | 9.4  | 26.6 | 31.1  | 3.4  | 334.1  | 86.1  | 71.6  | 13.25 | 29   | 5.8   |
| GKS-30 | 8.97  | 4.81  | 7.12  | 11.79 | 27.55 | 0.03 | 0.51 | 0.24 | 6  | 38.5 | 99.75 | 9.8   | 1.7  | 5    | 6.2   | 3.1  | 67.9   | 20.2  | 20.5  | 3.73  | 13   | 10.4  |
| ZK-1   | 4.33  | 1.43  | 2.77  | 18.13 | 28.99 | 0.02 | 0.24 | 0.06 | 2  | 43.6 | 99.68 | 18.5  | 0.4  | 1.7  | 1.6   | 5.4  | 15.2   | 4.8   | 3.4   | 0.75  | 23   | 14.4  |
| ZK-2   | 3.88  | 1.36  | 2.75  | 18.59 | 28.77 | 0.02 | 0.24 | 0.06 | 2  | 43.8 | 99.65 | 24.4  | 0.3  | 1.6  | 1.3   | 6.4  | 14.3   | 4.4   | 3.7   | 0.67  | 22   | 19.4  |
| ZS-1   | 96.29 | 1.6   | 0.43  | 0.01  | 0.32  | 0.01 | 0.02 | 0.18 | 1  | 1.1  | 100   | 2.8   | 2.3  | 5.5  | 5     | 0.6  | 84.2   | 12.8  | 13.2  | 2     | 3    | 10.8  |
| ZS-3   | 93.45 | 3.65  | 0.28  | 0.01  | 0.04  | 0.01 | 0.04 | 0.62 | 4  | 1.7  | 99.87 | 1.9   | 19.2 | 13.7 | 18.8  | 2.7  | 719.2  | 51.8  | 57.5  | 9.62  | 2    | 6.2   |
| ZS-4   | 86.99 | 7.95  | 0.82  | 0.02  | 0.05  | 0.01 | 0.13 | 0.7  | 6  | 3.2  | 99.89 | 2.1   | 17.3 | 16   | 22.1  | 2.4  | 639.8  | 37.1  | 35.6  | 6.13  | 1    | 4.4   |
| ZS-6   | 76.88 | 12.45 | 4.29  | 0.05  | 0.06  | 0.01 | 0.27 | 0.67 | 8  | 5.2  | 99.93 | 4.8   | 6.2  | 14   | 18.3  | 1.8  | 228.4  | 54.3  | 40.7  | 7.07  | 2    | 6.2   |
| ZS-8   | 91.51 | 1.63  | 3.03  | 0.01  | 0.49  | 0.01 | 0.03 | 1.5  | 7  | 1.3  | 99.59 | 5.9   | 63.9 | 27.2 | 112.1 | 13.6 | 2357.7 | 146.5 | 130.6 | 24.37 | 14   | 13.4  |
| ZS-9   | 85.93 | 8.64  | 0.97  | 0.01  | 0.01  | 0.01 | 0.03 | 0.84 | 8  | 3.4  | 99.91 | 7.4   | 16.2 | 23.1 | 29.3  | 2.8  | 597.5  | 38    | 30.8  | 5.32  | 3    | 8.8   |
| ZS-11  | 95.74 | 2.55  | 0.35  | 0.01  | 0.01  | 0.01 | 0.02 | 0.1  | 1  | 1.2  | 100   | 2.4   | 2    | 2.3  | 4.4   | 0.3  | 70.9   | 23.2  | 17.8  | 2.01  | 2    | 5.2   |
| ZS-12  | 94.24 | 3.38  | 0.62  | 0.01  | 0.01  | 0.01 | 0.01 | 0.2  | 2  | 1.5  | 99.99 | 2.8   | 2.8  | 5.5  | 7.2   | 0.5  | 104.5  | 24.3  | 23.3  | 3.03  | 3    | 11.4  |
| ZS-14  | 62.78 | 22.85 | 3.6   | 0.06  | 0.05  | 0.02 | 0.32 | 1.25 | 17 | 8.9  | 99.87 | 3.7   | 12.3 | 26.1 | 37    | 6.4  | 427.8  | 97.7  | 35.2  | 4.88  | 2    | 5.8   |
| ZL-1   | 49.84 | 29.77 | 7.23  | 0.06  | 0.07  | 0.02 | 0.32 | 0.94 | 18 | 11.6 | 99.91 | 2.4   | 3.2  | 20.8 | 19    | 2.6  | 112.9  | 110.1 | 43.1  | 5.13  | 2    | 1.6   |

|        |       |       |       |       |       |      |      |      |    |      |        |      |      |      |      |      |       |       |       |       |     |      |
|--------|-------|-------|-------|-------|-------|------|------|------|----|------|--------|------|------|------|------|------|-------|-------|-------|-------|-----|------|
| ZL-2   | 43.74 | 35.83 | 2.62  | 0.17  | 0.2   | 0.01 | 0.15 | 2.51 | 14 | 14.4 | 99.76  | 15.4 | 27.5 | 53.3 | 105  | 4.6  | 953.9 | 39.6  | 39.5  | 8.75  | 3   | 8.5  |
| DZ-1   | 48.73 | 30.5  | 1.75  | 0.56  | 0.77  | 0.15 | 2    | 1.7  | 26 | 13.3 | 99.74  | 4.5  | 22.3 | 33.5 | 43.5 | 6.9  | 799.9 | 96.5  | 89.8  | 11.47 | 4   | 2    |
| DZ-2   | 83.94 | 3.96  | 8.08  | 0.06  | 0.16  | 0.01 | 0.08 | 0.46 | 4  | 3    | 99.91  | 2.3  | 10.9 | 8.8  | 16.6 | 7    | 407.2 | 28.1  | 33.2  | 6.34  | 43  | 6.6  |
| DZ-3   | 95.62 | 2.02  | 0.75  | 0.02  | 0.04  | 0.01 | 0.1  | 0.14 | 1  | 1.3  | 100.01 | 1.2  | 1.6  | 2.4  | 2.5  | 0.5  | 58.9  | 7.6   | 6.3   | 1.11  | 5   | 5.9  |
| DZ-4   | 62.91 | 22.34 | 1.3   | 0.61  | 0.25  | 0.1  | 2.86 | 1.36 | 19 | 8    | 99.82  | 2.9  | 10.8 | 26   | 24.9 | 3.9  | 414.7 | 62    | 56.7  | 10.58 | 2   | 2.3  |
| DZ-6   | 64.64 | 21.19 | 1.22  | 0.49  | 0.11  | 0.08 | 2.7  | 1.33 | 18 | 8    | 99.86  | 3.4  | 12   | 24.6 | 25.1 | 3.9  | 417   | 56.6  | 47.8  | 8.99  | 9   | 2.4  |
| DZ-8   | 59.81 | 25.55 | 0.92  | 0.26  | 0.19  | 0.05 | 0.75 | 2.03 | 19 | 10.2 | 99.82  | 3.8  | 18.9 | 39.1 | 30.9 | 6    | 733   | 50.2  | 33.1  | 5.94  | 1   | 1.2  |
| DZ-9   | 66.62 | 20.35 | 0.66  | 0.25  | 0.06  | 0.05 | 0.66 | 3.11 | 23 | 7.9  | 99.77  | 2.5  | 20   | 55.4 | 41.1 | 9.8  | 721   | 105.5 | 171.5 | 36.17 | 1   | 1    |
| DZ9a   | 59.38 | 21.36 | 4.43  | 0.78  | 0.09  | 0.09 | 2.97 | 1.38 | 19 | 9.2  | 99.78  | 19.7 | 12.7 | 27.5 | 27.2 | 4.2  | 447.5 | 62    | 49.8  | 9.18  | 27  | 23.9 |
| DZ-10  | 20.06 | 11.1  | 13.7  | 7.82  | 17.2  | 0.05 | 1    | 0.55 | 12 | 28.1 | 99.79  | 15.5 | 3    | 11.2 | 12.7 | 1.8  | 101.6 | 32.1  | 25.5  | 4.81  | 21  | 11.3 |
| DZ-11  | 52.06 | 28.4  | 2.7   | 0.92  | 0.16  | 0.09 | 2.61 | 1.53 | 19 | 11.2 | 99.81  | 13   | 8.1  | 30.7 | 29.9 | 3.5  | 303.2 | 74.3  | 56.8  | 9.14  | 29  | 9.7  |
| DZ12   | 59.19 | 19.96 | 6.06  | 0.88  | 0.11  | 0.08 | 2.99 | 1.25 | 21 | 9.1  | 99.83  | 21.9 | 8.6  | 22.3 | 22.3 | 3.3  | 307.6 | 53.7  | 41.8  | 7.68  | 34  | 21.4 |
| DZ12a  | 65.43 | 19.28 | 1.73  | 0.61  | 0.17  | 0.08 | 2.81 | 1.27 | 16 | 8.4  | 99.83  | 5    | 11.6 | 22.4 | 23.9 | 3.9  | 407.1 | 53.9  | 39.2  | 7.06  | 10  | 5.7  |
| DZ-13  | 58.3  | 4.13  | 4.9   | 4.09  | 11.5  | 0.02 | 0.32 | 0.5  | 6  | 15.9 | 99.85  | 8.2  | 8.7  | 9.6  | 8.9  | 1.5  | 331.8 | 22.5  | 18.3  | 3.35  | 18  | 7.4  |
| DZ-14  | 56.45 | 23.51 | 2.51  | 0.99  | 1.42  | 0.08 | 2.64 | 1.51 | 21 | 10.5 | 99.8   | 6.5  | 10.9 | 30.9 | 25.1 | 3.3  | 406.1 | 66.8  | 46.7  | 7.71  | 12  | 7.6  |
| DZ-15  | 80.98 | 11.02 | 0.55  | 0.16  | 0.11  | 0.06 | 0.73 | 1.23 | 17 | 5    | 99.89  | 1.6  | 13   | 20.7 | 16.9 | 3    | 472.6 | 36.9  | 25.3  | 4.28  | 2   | 1.3  |
| DZ-17  | 18.26 | 1.8   | 2.26  | 0.56  | 42.01 | 0.02 | 0.24 | 0.16 | 4  | 34.5 | 99.94  | 5.8  | 1.7  | 3.1  | 3.8  | 0.8  | 65.3  | 16.6  | 16.9  | 3.35  | 5   | 5.9  |
| DZ-18  | 63.91 | 22.09 | 2.86  | 0.13  | 0.11  | 0.03 | 0.56 | 1.35 | 13 | 8.6  | 99.79  | 6.9  | 16.9 | 29.5 | 56   | 4.8  | 628.3 | 141.1 | 112.7 | 15.34 | 6   | 10.3 |
| DZ-18a | 66.5  | 1.18  | 1.08  | 0.15  | 16.81 | 0.01 | 0.14 | 0.28 | 2  | 13.8 | 99.96  | 3.5  | 5.2  | 4.1  | 3.8  | 0.6  | 193.4 | 11    | 12.2  | 2.52  | 4   | 5.2  |
| DZ-20  | 62.19 | 20.99 | 2.96  | 0.9   | 0.16  | 0.07 | 2.52 | 1.27 | 20 | 8.7  | 99.85  | 23.5 | 9.7  | 23.7 | 24.7 | 2.9  | 335.1 | 56.6  | 39    | 6.23  | 25  | 16.7 |
| DZ-23  | 94.07 | 2.45  | 0.65  | 0.1   | 0.32  | 0.02 | 0.31 | 0.53 | 4  | 1.4  | 99.92  | 5.5  | 10.4 | 9.8  | 8.9  | 1.9  | 397.6 | 27.2  | 22.1  | 3.84  | 8   | 4.5  |
| DZ-25  | 90.55 | 2.31  | 4.34  | 0.08  | 0.37  | 0.03 | 0.08 | 0.78 | 4  | 1.3  | 99.92  | 5.2  | 13.5 | 13   | 9.7  | 2.5  | 514.9 | 9.7   | 6.2   | 1.37  | 11  | 7.4  |
| DZ-26  | 97.59 | 0.91  | 0.3   | 0.02  | 0.14  | 0.01 | 0.06 | 0.31 | 2  | 0.6  | 99.99  | 1.3  | 4.7  | 3.7  | 2.8  | 0.5  | 178.9 | 6.9   | 5.8   | 1.05  | 3   | 6.3  |
| DZ-27  | 22.58 | 6.39  | 8.74  | 9.12  | 20.9  | 0.03 | 0.6  | 0.48 | 7  | 30.8 | 99.79  | 4.9  | 4    | 8.1  | 8.4  | 1.1  | 151.3 | 25.9  | 24.4  | 4.27  | 13  | 3.5  |
| KS-4   | 48.34 | 16.85 | 6.18  | 4.44  | 2.88  | 0.12 | 5.08 | 0.89 | 13 | 14.7 | 99.79  | 14.3 | 12.7 | 22.5 | 25.4 | 18   | 454.3 | 40.7  | 34.7  | 6.16  | 18  | 35.5 |
| KS-6   | 32.81 | 11.8  | 4.61  | 9.74  | 11.8  | 0.09 | 3.74 | 0.63 | 9  | 23.9 | 99.7   | 10.6 | 13.2 | 14.1 | 23.5 | 7.1  | 492.6 | 51    | 37.9  | 6.72  | 17  | 13.3 |
| KS-10  | 29.61 | 13.54 | 6.95  | 9.23  | 12.27 | 0.07 | 2.66 | 0.69 | 9  | 24.3 | 99.74  | 23.4 | 4.3  | 16.8 | 22.4 | 4.2  | 154.1 | 60.2  | 44.2  | 7.11  | 38  | 22.2 |
| KS-11a | 41.35 | 23.71 | 7.66  | 1.36  | 0.13  | 0.04 | 1.87 | 1.04 | 12 | 22.4 | 99.76  | 26.9 | 5.7  | 24.6 | 37.7 | 5.5  | 208.1 | 107.5 | 83.1  | 19.77 | 38  | 23   |
| ASH    | 33.21 | 20.07 | 14.54 | 1.7   | 3.14  | 0.04 | 1.83 | 0.81 | 11 | 23.9 | 99.78  | 66   | 4.7  | 19.4 | 24.2 | 5.8  | 175.6 | 84.7  | 113.1 | 32.81 | 193 | 39.1 |
| SD-a   | 1.66  | 0.48  | 6.53  | 18.11 | 28.77 | 0.03 | 0.06 | 0.03 | 1  | 43.6 | 99.67  | 51   | 0.3  | 0.7  | 0.4  | 2.5  | 10.3  | 2.6   | 3     | 1.36  | 69  | 30.8 |
| SD-b   | 9.08  | 7.2   | 1.45  | 0.09  | 26.24 | 0.04 | 0.09 | 0.04 | 1  | 25.2 | 69.95  | 14.9 | 0.3  | 2.6  | 0.5  | 3.3  | 14.7  | 2.8   | 4     | 4.05  | 71  | 34.3 |
| SD-c   | 61.69 | 19.55 | 4.1   | 0.72  | 0.09  | 0.09 | 2.44 | 1.49 | 15 | 9.4  | 99.75  | 4.6  | 20.2 | 32.3 | 48.8 | 10.3 | 734.3 | 106.9 | 91.7  | 15.31 | 13  | 5.2  |
| SD-1   | 94.28 | 2.7   | 0.26  | 0.08  | 0.01  | 0.03 | 0.26 | 0.78 | 3  | 1.4  | 99.88  | 0.6  | 21.5 | 15.3 | 31.6 | 3.1  | 763.5 | 50.1  | 39.6  | 6.44  | 2   | 2.8  |

|       |       |       |       |       |       |      |      |      |    |      |       |      |      |      |      |     |        |      |      |       |     |      |
|-------|-------|-------|-------|-------|-------|------|------|------|----|------|-------|------|------|------|------|-----|--------|------|------|-------|-----|------|
| SD-2  | 51.04 | 29.7  | 2.43  | 0.57  | 0.2   | 0.11 | 1.56 | 1.33 | 18 | 12.8 | 99.85 | 6.3  | 9.7  | 30.5 | 44.6 | 4   | 359.4  | 89.9 | 60.5 | 8.37  | 4   | 2.3  |
| SD-3  | 50.36 | 29.57 | 3.44  | 0.69  | 0.06  | 0.11 | 2.08 | 1.25 | 18 | 12.2 | 99.86 | 7.9  | 7    | 27.6 | 36.7 | 4.7 | 250.7  | 77   | 44.4 | 7.35  | 3   | 4.5  |
| SD-4  | 62.06 | 0.89  | 4.8   | 5.85  | 9.84  | 0.02 | 0.19 | 0.56 | 3  | 15.2 | 99.84 | 6.9  | 7.3  | 11   | 20.2 | 1.7 | 284.5  | 30.3 | 39.7 | 8     | 8   | 8.2  |
| SD-5  | 89.22 | 6.13  | 0.43  | 0.01  | 0.01  | 0.01 | 0.05 | 1.42 | 7  | 2.5  | 99.83 | 1.9  | 29.3 | 27.9 | 44   | 3.9 | 1055.3 | 45.2 | 41.1 | 8.48  | 2   | 3.6  |
| SD-6  | 51.7  | 3.8   | 35.32 | 0.36  | 0.12  | 0.02 | 0.33 | 0.74 | 19 | 6.7  | 99.84 | 35.9 | 19.4 | 14.6 | 40.8 | 5.2 | 712    | 34.8 | 32.4 | 7.15  | 101 | 25.8 |
| SD-7  | 78.16 | 12.69 | 1.05  | 0.25  | 0.1   | 0.1  | 1.13 | 1.58 | 9  | 4.6  | 99.77 | 2.6  | 26.4 | 35.3 | 39.9 | 11  | 992.5  | 95.8 | 75.4 | 12.58 | 2   | 2.9  |
| SD-8  | 52.27 | 20.01 | 18.13 | 0.03  | 0.01  | 0.02 | 0.19 | 1.2  | 15 | 8    | 99.85 | 3.2  | 15   | 23.9 | 55.2 | 3.9 | 515.9  | 25.1 | 14.5 | 2.68  | 2   | 1    |
| SD-9  | 90.74 | 0.6   | 6.55  | 0.03  | 0.08  | 0.02 | 0.01 | 0.19 | 1  | 1.7  | 99.97 | 1.3  | 3    | 5.5  | 4.9  | 2   | 112.6  | 8.1  | 7.4  | 1.01  | 13  | 4    |
| SD-10 | 83.53 | 0.9   | 12.64 | 0.01  | 0.02  | 0.01 | 0.03 | 0.2  | 1  | 2.6  | 99.97 | 1.8  | 2.9  | 4.3  | 6.2  | 0.7 | 113.3  | 8.7  | 7.7  | 1.48  | 48  | 4.4  |
| SD-11 | 5.25  | 1.18  | 18.55 | 11.5  | 27.59 | 0.09 | 0.06 | 0.1  | 3  | 34.6 | 99.7  | 28.8 | 1.4  | 1.9  | 2    | 0.9 | 59.2   | 9    | 8.7  | 1.94  | 277 | 22.1 |
| SD-12 | 2.14  | 1.04  | 0.88  | 0.16  | 31.95 | 0.02 | 0.03 | 0.06 | 1  | 21.3 | 57.64 | 14.2 | 0.7  | 3.6  | 0.6  | 0.4 | 26.4   | 3    | 3.5  | 0.75  | 130 | 16.5 |
| SD-13 | 8.14  | 2.97  | 5.91  | 15.77 | 26.83 | 0.03 | 0.21 | 0.21 | 3  | 39.4 | 99.69 | 21   | 1.6  | 4.5  | 4.1  | 1.1 | 58.9   | 11.1 | 9.1  | 1.68  | 100 | 22.6 |
| SD-14 | 2.23  | 4.96  | 0.68  | 0.05  | 28.79 | 0.54 | 0.21 | 0.06 | 21 | 25.1 | 62.6  | 0.5  | 0.4  | 1.3  | 0.9  | 0.6 | 24.2   | 6.6  | 4.6  | 0.73  | 16  | 2.8  |
| SD-15 | 37.52 | 22.21 | 3.04  | 1.32  | 7.73  | 0.06 | 2.17 | 1    | 14 | 16.5 | 91.68 | 13.4 | 5    | 23.3 | 21.7 | 2.4 | 181.5  | 52   | 42.7 | 8.08  | 11  | 15.6 |
