# Supplementary material
Source: MDPI journal article supplement (https://www.mdpi.com/2075-163X/11/6/573)
Supplement: s1 [file s1]

| <b>Sample</b> | <b>Zircon</b> | <b>Tourmaline</b> | <b>Rutlie</b> | <b>Starulite</b> | <b>Chlorite</b> | <b>Choritoid</b> | <b>Others</b> | <b>Total</b> |
|---------------|---------------|-------------------|---------------|------------------|-----------------|------------------|---------------|--------------|
| KF-1          | 84            | 67                | 67            | 29               | 2               | 1                | 0             | 250          |
| KF-2          | 141           | 36                | 56            | 16               | 1               | 0                | 0             | 250          |
| KF-4          | 88            | 101               | 51            | 8                | 1               | 1                | 0             | 250          |
| KF-8          | 50            | 143               | 49            | 7                | 1               | 0                | 0             | 250          |
| KF-10         | 92            | 87                | 55            | 16               | 0               | 0                | 0             | 250          |
| KF-13         | 43            | 98                | 86            | 23               | 0               | 0                | 0             | 250          |
| KF-14         | 128           | 66                | 46            | 10               | 0               | 0                | 0             | 250          |
| DK-b          | 53            | 142               | 45            | 10               | 0               | 0                | 0             | 250          |
| DK-c          | 80            | 110               | 49            | 9                | 1               | 1                | 0             | 250          |
| DK-d          | 84            | 128               | 29            | 9                | 0               | 0                | 0             | 250          |
| ZS-1          | 78            | 85                | 62            | 20               | 4               | 1                | 0             | 250          |
| ZS-5          | 111           | 71                | 65            | 3                | 0               | 0                | 0             | 250          |
| ZS-6          | 86            | 103               | 49            | 9                | 2               | 1                | 0             | 250          |
| ZS-7          | 80            | 101               | 59            | 9                | 1               | 0                | 0             | 250          |
| ZS-9          | 87            | 112               | 49            | 2                | 0               | 0                | 0             | 250          |
| SZ-11         | 61            | 136               | 50            | 3                | 0               | 0                | 0             | 250          |
| ZS-12         | 57            | 107               | 75            | 11               | 0               | 0                | 0             | 250          |
| ZS-13         | 50            | 140               | 57            | 3                | 0               | 0                | 0             | 250          |
| DZ-2          | 57            | 114               | 77            | 2                | 0               | 0                | 0             | 250          |
| DZ-23         | 41            | 187               | 21            | 1                | 0               | 0                | 0             | 250          |
| DZ-25         | 34            | 186               | 30            | 0                | 0               | 0                | 0             | 250          |
| GKS-3         | 113           | 86                | 49            | 1                | 0               | 0                | 1             | 250          |
| GKS-4         | 114           | 60                | 73            | 3                | 0               | 0                | 0             | 250          |
| GKS-6         | 87            | 105               | 56            | 2                | 0               | 0                | 0             | 250          |
| DN-1          | 71            | 136               | 41            | 2                | 0               | 0                | 0             | 250          |
| DN-3          | 69            | 131               | 49            | 1                | 0               | 0                | 0             | 250          |
| DN-9          | 64            | 151               | 35            | 0                | 0               | 0                | 0             | 250          |
| DN-26         | 71            | 146               | 33            | 0                | 0               | 0                | 0             | 250          |
| DN-38         | 55            | 165               | 30            | 0                | 0               | 0                | 0             | 250          |
| DN-43         | 45            | 162               | 43            | 0                | 0               | 0                | 0             | 250          |
